# Supplementary material for: The Difference Between Real and Potential Power: Voting Power, Attendance and Cohesion. ZEI Discussion Paper: 2004, 130
Source: MDPI journal article supplement (doi:10.3390/biomedicines12030543), 2004-01-01
Supplement: s1 [file s1]

## **Supplementary Materials**

### **SARS-CoV-2 infection causes heightened disease severity and mortality in a mouse model of Down syndrome**

Roger D. Pechous<sup>1</sup>, Priyangi A. Malaviarachchi<sup>1</sup>, Zhuo Xing<sup>2</sup>, Avrium Douglas<sup>2</sup>, Samantha D. Crane<sup>1†</sup>, Hayley M. Theriot<sup>1</sup>, Zijing Zhang<sup>3</sup>, Alireza Ghaffrieh<sup>4</sup>, Lu Huang<sup>1</sup>, Y. Eugene Yu<sup>2\*</sup>, Xuming Zhang<sup>1\*</sup>

**This file includes:**

Supplementary Figures S1-S2

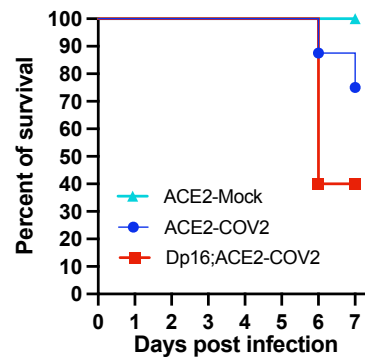

**Fig. S1. Percent of survival of ACE2 and Dp16;ACE2 mice following SARS-CoV-2 infection.** ACE2 and Dp16;ACE2 mice were infected intranasally with SARS-CoV-2 (COV2) at  $2.5 \times 10^4$  PFU per mouse or mock-infected (mock) as control. The experiment was terminated on day 7 p.i. n = 4, 8, and 5 for ACE2-Mock, ACE2-COV2, and Dp16;ACE2, respectively.

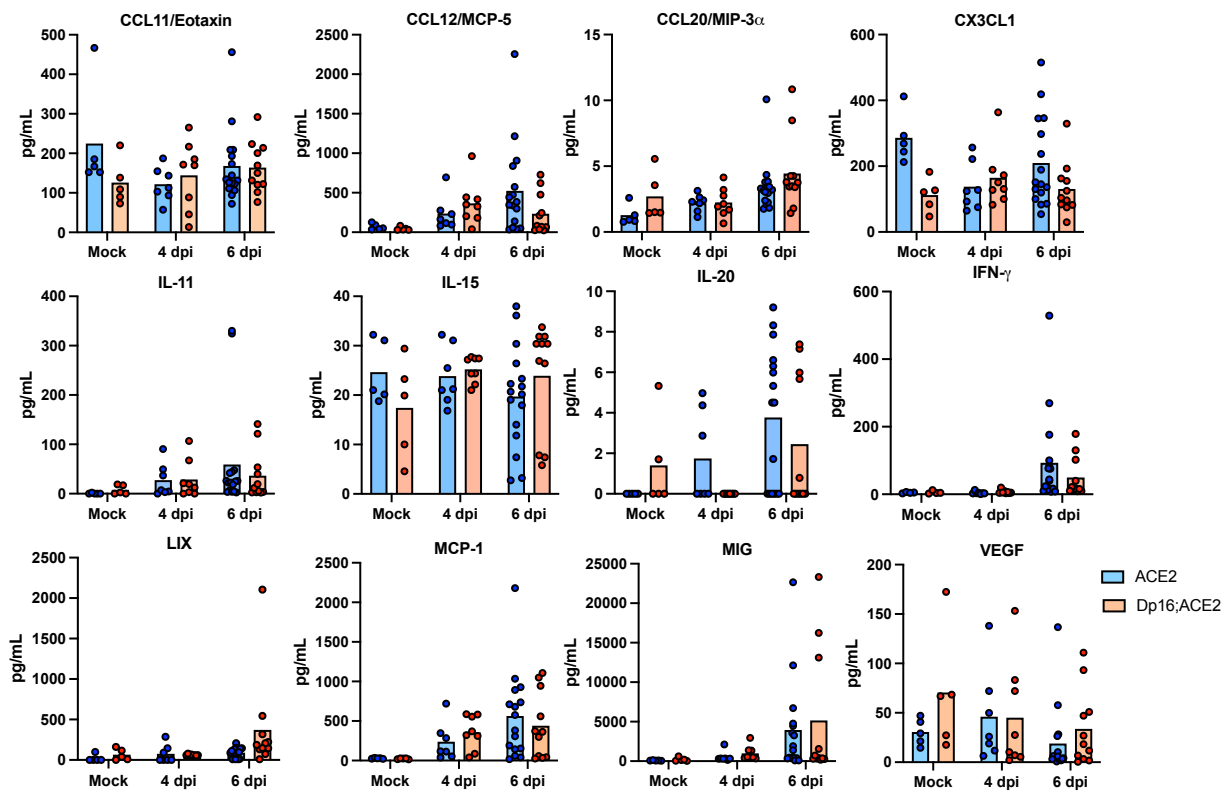

**Fig. S2. Additional chemokine and cytokine responses to SARS-CoV-2 infection in the lungs of ACE2 and Dp16;ACE2 mice.** Flow cytometric beads array analysis was carried out to determine the amount of cytokine and chemokine proteins in lung homogenates from ACE2 and Dp16;ACE2 mice following mock infection (Mock) or intranasal infection with SARS-CoV-2 at  $2.5 \times 10^4$  PFU at 4 dpi and 6 dpi (4 independent experiments; n = 5, 7, and 16 for mock, 4 dpi and 6 dpi, respectively, for ACE2 mice; n = 5, 8, and 11 for mock, 4 dpi and 6 dpi, respectively, for Dp16;ACE2 mice).
